# Supplementary material
Source: PubMed Central journal article supplement (PMC4958172)
Supplement: AAC.00014-16_zac008165431so1.pdf [file AAC.00014-16_zac008165431so1.pdf]

## Materials and Methods

***In silico* analysis of plasmid transfer genes for Figure S6.** 77 genes putatively associated with plasmid transfer functions in the literature including: antirestriction, pilus formation, incompatibility, stability, and stress response were extracted from 6050 RefSeq plasmid records at NCBI. Genes were clustered with CD-HIT at 98% identity and 90% length difference cutoffs to create a non-redundant database of 8733 gene sequences. Plasmid sequences from conjugation donors and *K. pneumoniae* patient isolate recipient strains as well as several *bla*<sub>KPC</sub> or *bla*<sub>OXA-48</sub> plasmids from the literature (1, 2) were compared to this database. We extracted putative protein-coding sequences from these plasmids using Prokka ver. 1.12 (3) and compared amino-acid sequences of the encoded proteins to our reference database using TBLASTN ver. 2.2.31+. A gene was considered to be present if it was found at 50% coverage and a minimum E-value of 1e-5. Genes that were found together in 98% clustering were collapsed. The presence/absence of genes and the identity level of best match between plasmid-encoded proteins and our reference set was visualized using R version 3.2.4.

| Transfer -<br>Tra | Transfer -<br>Other | Stability/<br>Toxin-<br>Antitoxin/Replication | Anti-<br>restriction | Stress<br>Response | Entry or<br>Surface<br>Exclusion |
|-------------------|---------------------|-----------------------------------------------|----------------------|--------------------|----------------------------------|
| <i>traA</i>       | <i>finO</i>         | <i>kikA</i>                                   | <i>ardA</i>          | <i>mucA</i>        | <i>eex</i>                       |
| <i>traB</i>       | <i>mobB</i>         | <i>korA</i>                                   | <i>ardB</i>          | <i>nucB/umuC</i>   | <i>traS</i>                      |
| <i>traB/traK</i>  | <i>mobC</i>         | <i>korB</i>                                   | <i>ardB/klcA</i>     | <i>psiA</i>        | <i>traT</i>                      |
| <i>traB/trbI</i>  | <i>pilT</i>         | <i>korB/parB</i>                              | <i>ccgC</i>          | <i>psiB</i>        |                                  |
| <i>traC</i>       | <i>pilT/vagD</i>    | <i>nuc</i>                                    | <i>ccgD</i>          | <i>umuC</i>        |                                  |
| <i>traD</i>       | <i>tir</i>          | <i>parA</i>                                   | <i>klcA</i>          | <i>umuD</i>        |                                  |
| <i>traE</i>       | <i>traA/virB3</i>   | <i>parB</i>                                   |                      |                    |                                  |
| <i>traE/traK</i>  | <i>traB/virB4</i>   | <i>relE</i>                                   |                      |                    |                                  |
| <i>traF</i>       | <i>traC/virB5</i>   | <i>repA</i>                                   |                      |                    |                                  |
| <i>traG</i>       | <i>traD/traJ</i>    | <i>stbA</i>                                   |                      |                    |                                  |
| <i>traH</i>       | <i>traD/virB6</i>   | <i>stbB</i>                                   |                      |                    |                                  |
| <i>traI</i>       | <i>traE/virB8</i>   | <i>stbC</i>                                   |                      |                    |                                  |
| <i>traJ</i>       | <i>traF/virB10</i>  | <i>vagC</i>                                   |                      |                    |                                  |
| <i>traK</i>       | <i>traG/virB11</i>  | <i>vagD</i>                                   |                      |                    |                                  |
| <i>traL</i>       | <i>traL/virB1</i>   |                                               |                      |                    |                                  |

|             |              |
|-------------|--------------|
| <i>traM</i> | <i>trbB</i>  |
| <i>traN</i> | <i>trbC</i>  |
| <i>traQ</i> | <i>trbE</i>  |
| <i>traR</i> | <i>trbI</i>  |
| <i>traU</i> | <i>trbJ</i>  |
| <i>traV</i> | <i>trbL</i>  |
| <i>traW</i> | <i>virB4</i> |
| <i>traX</i> | <i>virB8</i> |
| <i>traY</i> | <i>virB9</i> |

**Time course of pKpQ-GFP conjugation used to select time of incubation for experiments in this report.** Conjugation was measured at hours 1, 2, 4, 8, 12, 16, and 20 between Kpn1760CT\_pKpQGFP and Kpn223 in broth culture incubated at 37°C with no agitation. No transconjugants were observed at hours 1 or 2. Kpn223 transconjugants were observed after 4 hours of incubation, and the conjugation frequency was calculated as  $2.1 \times 10^{-6} \pm 9.2 \times 10^{-7}$  compared to  $6.4 \times 10^{-2} \pm 6.8 \times 10^{-3}$  at 20 h. Conjugation experiments were conducted at hour 4 between Kpn1760CT\_pKpQGFP and Kpn731, Kpn808, and *E. coli* XL-1 and no transconjugants were detected (n=3). Based on these data and similar published studies, we selected 20 h as the incubation time for all experiments.

**Supplemental Table S1. Conjugation rates of plasmids from KPNIH1760 and transformed isogenic strains to Kpn223 and XL-1**

| Donor             | Recipient                     |                              |
|-------------------|-------------------------------|------------------------------|
|                   | Kpn223                        | XL-1                         |
| KPNIH1760         | $3.5 \pm 0.9 \times 10^{-2a}$ | $3.2 \pm 1.3 \times 10^{-4}$ |
| Kpn1760CT_pKpQGFP | $5.6 \pm 0.6 \times 10^{-2}$  | $3.8 \pm 0.8 \times 10^{-3}$ |
| Kpn1760CT_pKpQIL  | $4.7 \pm 0.7 \times 10^{-2}$  | $1.1 \pm 0.3 \times 10^{-3}$ |

<sup>a</sup>Avg conjugation frequencies (CFU transconjugants / CFU recipients)  $\pm$  SEM.

**Supplemental Table S2. Plasmid and antibiotic susceptibility profiles of CAV1193 isogenic strains**

| Strain                              | CAV1193                               | C1193_KPCCURE                         | C1193_GentCURE                        | C1193_CURE                            | C1193CT_pKpQGFP                       |
|-------------------------------------|---------------------------------------|---------------------------------------|---------------------------------------|---------------------------------------|---------------------------------------|
| <b>Susceptibility</b>               | Mero <sup>R</sup> , Gent <sup>R</sup> | Mero <sup>S</sup> , Gent <sup>R</sup> | Mero <sup>R</sup> , Gent <sup>S</sup> | Mero <sup>S</sup> , Gent <sup>S</sup> | Mero <sup>R</sup> , Gent <sup>S</sup> |
| <b><i>bla</i><sub>KPC</sub> PCR</b> | Positive                              | Negative                              | Positive                              | Negative                              | Positive                              |
| <b>Passage #</b>                    | N/A                                   | 22                                    | 8                                     | 57                                    | 57                                    |
| <b>Plasmid Presence</b>             | pKPC_CAV1193                          |                                       | pKPC_CAV1193                          |                                       |                                       |
|                                     | pCAV1193-3741                         | pCAV1193-3741                         |                                       | pCAV1193-3741                         | pCAV1193-3741                         |
|                                     | pCAV1193-78                           | pCAV1193-78                           |                                       |                                       |                                       |
|                                     | pCAV1193-166                          | pCAV1193-166                          |                                       |                                       |                                       |
|                                     | pCAV1193-258                          | pCAV1193-258                          |                                       | pCAV1193-258                          | pCAV1193-258                          |

**Supplemental Table S3. MIC data of selected transconjugants following *in vitro* mating**

|                               | Kpn223 | Kpn223 TC <sup>a</sup><br>pKpQ-GFP | Kpn731 | Kpn731 TC<br>pKpQ-GFP | Kpn1760CT_<br>pKpQ-GFP |
|-------------------------------|--------|------------------------------------|--------|-----------------------|------------------------|
| Amikacin                      | ≤16    | ≤16                                | ≤16    | ≤16                   | 32                     |
| Amoxicillin/Clavulanate       | ≤8     | >16                                | ≤8     | >16                   | >16                    |
| Ampicillin                    | >16    | >16                                | >16    | >16                   | >16                    |
| Aztreonam                     | ≤4     | >8                                 | ≤4     | >8                    | >8                     |
| Cefazolin                     | ≤2     | >4                                 | ≤2     | >4                    | >4                     |
| Cefepime                      | ≤8     | >16                                | ≤8 I   | 16 R                  |                        |
| Cefotaxime                    | ≤1     | 64                                 | ≤1     | 16                    | 64                     |
| Cefoxitin                     | 16     | >16                                | 16     | >16                   | >16                    |
| Ceftaroline                   | ≤0.25  | >2                                 | ≤0.25  | >2                    | >2                     |
| Ceftazidime                   | ≤2     | 64                                 | ≤2     | 128                   | >128                   |
| Ceftriaxone                   | ≤1     | >32                                | ≤1     | >32                   | >32                    |
| Chloramphenicol               |        | >16                                |        | ≤8                    | 16                     |
| Ciprofloxacin                 | >2     | >2                                 | ≤1     | ≤1                    | >2                     |
| Colistin                      |        | ≤2                                 |        | ≤2                    | >4                     |
| Doripenem                     | ≤1     | >4                                 | ≤1     | 2                     | >4                     |
| Doxycycline                   | >8     | >8                                 | >8     | >8                    |                        |
| Ertapenem                     | ≤0.5   | >4                                 | ≤0.5   | >4                    | >4                     |
| Gentamicin                    | >8     | >8                                 | ≤4     | ≤4                    | ≤4                     |
| Imipenem                      | ≤1     | >4                                 | ≤1     | >4                    | >4                     |
| Levofloxacin                  | ≤2     | ≤2                                 | ≤2     | ≤2                    | >4                     |
| Meropenem                     | ≤1     | >8                                 | ≤1     | 4                     | >8                     |
| Piperacillin                  | ≤16    | >64                                | ≤16    | >64                   | >64                    |
| Piperacillin/Tazobactam       | ≤16    | >64                                | ≤16    | >64                   | >64                    |
| Tigecycline                   | ≤0.5   | ≤0.5                               | ≤0.5   | ≤0.5                  | 1                      |
| Tobramycin                    | 8      | ≤4                                 | ≤4     | ≤4                    | >8                     |
| Trimethoprim/sulfamethoxazole | >2     | >2                                 | ≤2     | ≤2                    | >2                     |

<sup>a</sup>TC = Transconjugant.

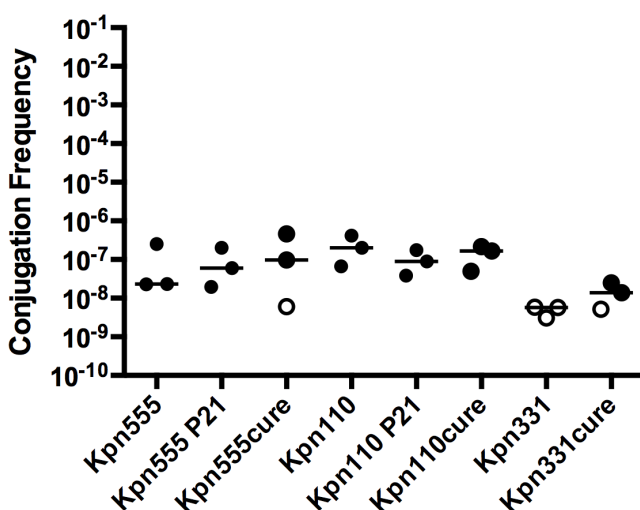

**Supplemental Figure 1.** Effect of recipient native plasmid content on pKpQ-GFP conjugation frequency. Donor is Kpn1760CT\_pKpQGFP. Recipients are Kpn555, Kpn110, Kpn331 and their derivatives cured of their IncFII plasmid: Kpn555cure, Kpn110cure, and Kpn331cure. Kpn555 P21 and Kpn110 P21 are controls that were passaged at elevated temperature like cured strains, but retained IncFII. All recipients except for Kpn331 were transformed with the gentamicin resistant plasmid pRU1103 required for selection following conjugation. pRU1103 was a gift from Philip Pool (Addgene plasmid #14467) (4). Conjugations performed for 20 h in broth culture at 37°C. Conjugation frequency given by (CFU transconjugants / CFU recipients). Bar indicates median. Solid circles: conjugation frequency; open circles: no transconjugants observed at the limit of detection. n = 3.

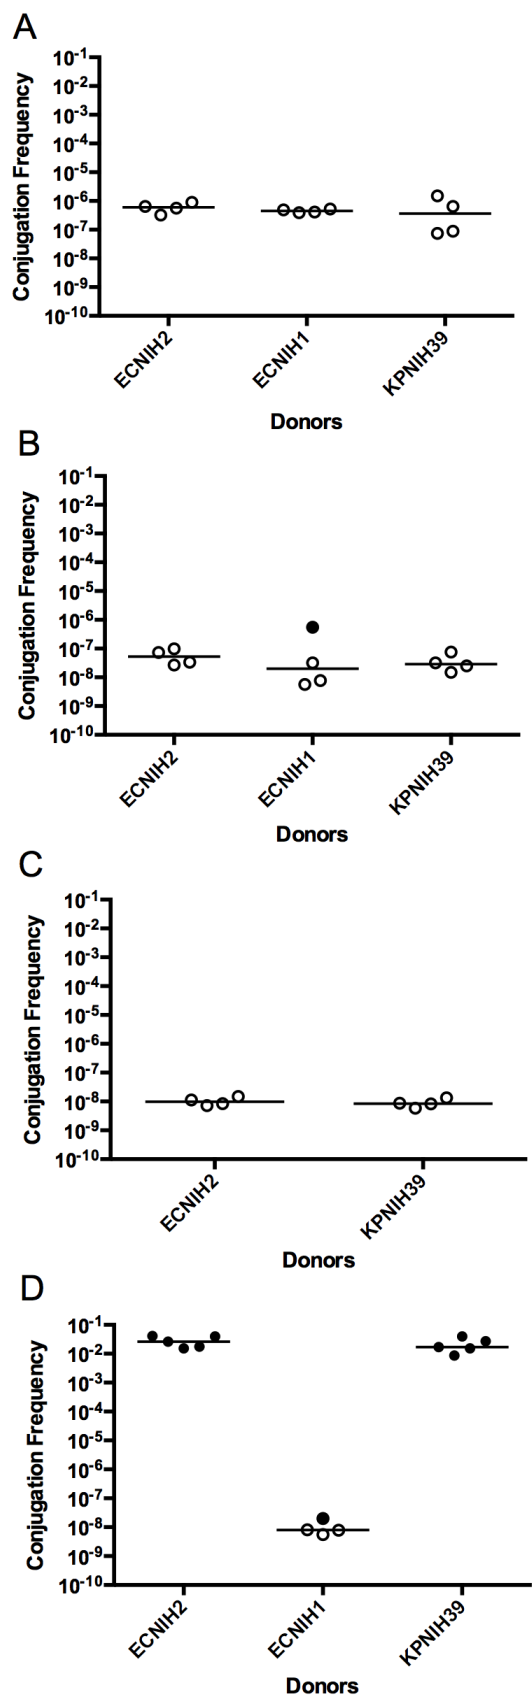

**Supplemental Figure 2.** Effect of donor species on *bla*<sub>KPC</sub>-plasmid conjugation frequency in broth culture. Donors are listed on the x-axis, and recipients are Eco556 (A), Eco889 (B), ECNIH2CURE (C), and Kpn223 (D). Broth culture conjugations performed for 20 h. Conjugation frequency given by (CFU transconjugants / CFU recipients). Kpn: *K. pneumoniae* and Eco: *E. coli*. Bar indicates median. Solid circles: conjugation frequency; open circles: no transconjugants observed at the limit of detection. n=4.

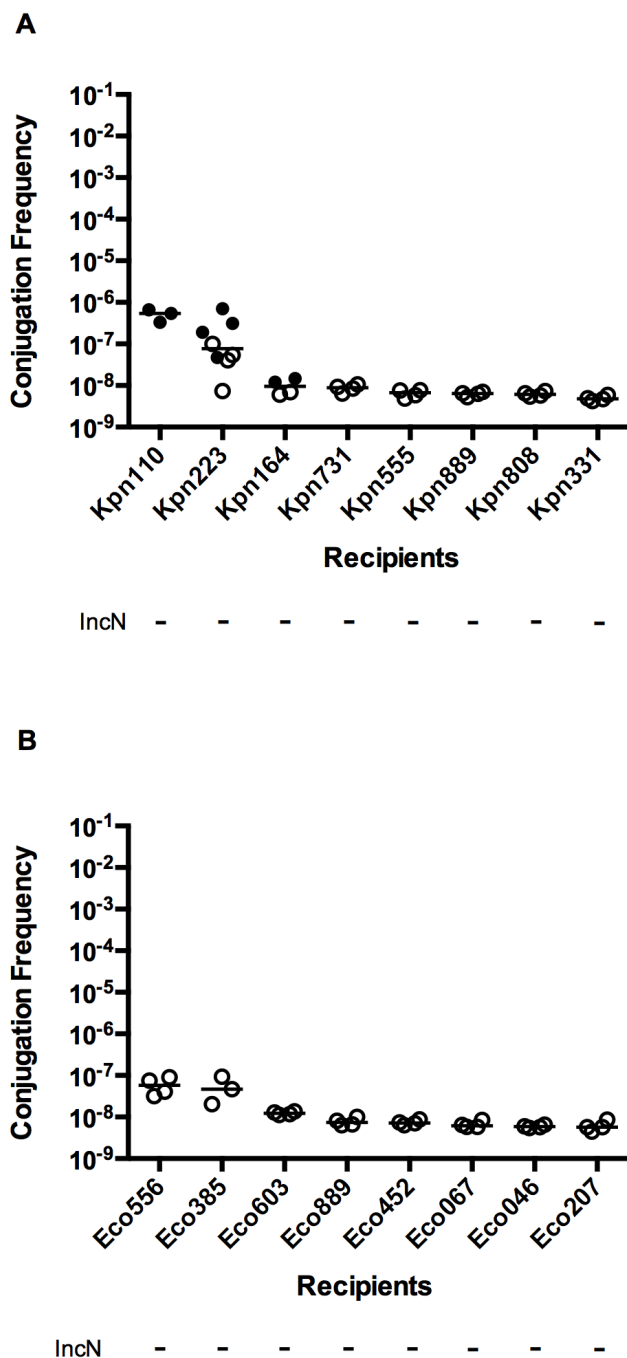

**Supplemental Figure 3.** Effect of recipient strain and species on p47e-GFP *in vitro* conjugation rates in broth culture. Donor is Kpn1760CT\_p47eGFP; *K. pneumoniae* (A) or *E. coli* (B) recipients are listed on the x-axis. Broth culture matings performed for 20 h. Conjugation frequency given by (CFU transconjugants / CFU recipients). Replicon typing performed as

described. Bar indicates median. Solid circles: conjugation frequency; open circles: no transconjugants observed at the limit of detection.  $n \geq 3$ .

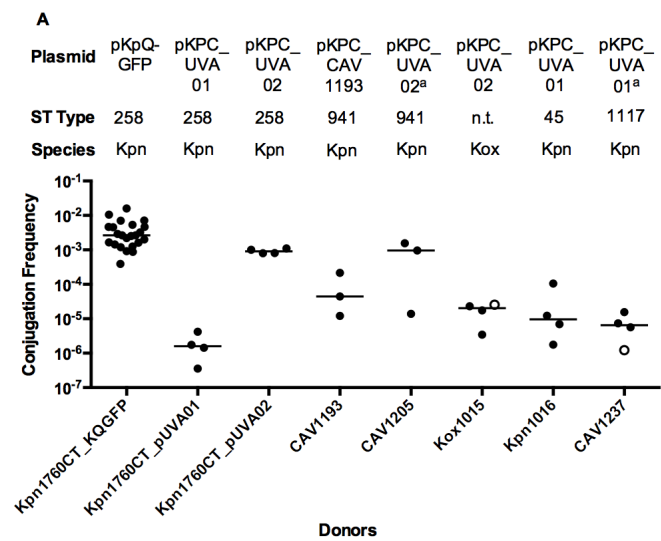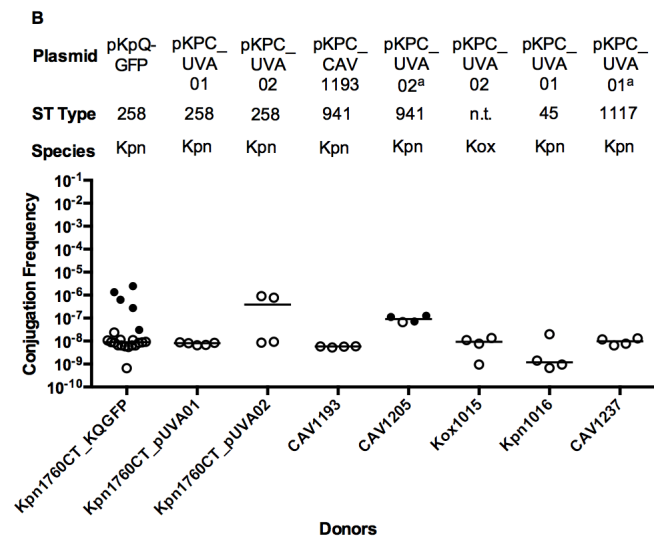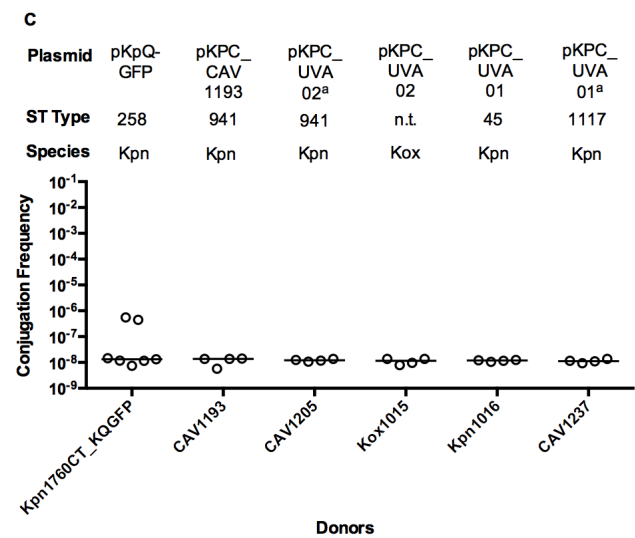

**Supplemental Figure 4.** Conjugation ability of Enterobacteriaceae isolates containing pKPC\_UVA01, pKPC\_CAV1193, or pKPC\_UVA02 to Enterobacteriaceae recipients. Donors are indicated on the x-axis; recipients are XL-1 (A), Kpn555 (B), and Eco385 (C). Broth culture conjugations performed for 20 h. Conjugation frequency given by (CFU transconjugants / CFU recipients). Kpn: *K. pneumoniae* and Eco: *E. coli*. Bar indicates median. Solid circles: conjugation frequency; open circles: no transconjugants observed at the limit of detection.  $n \geq 3$ .

<sup>a</sup>As determined by whole genome sequencing on the Illumina HiSeq platform and long-range PCR (5).

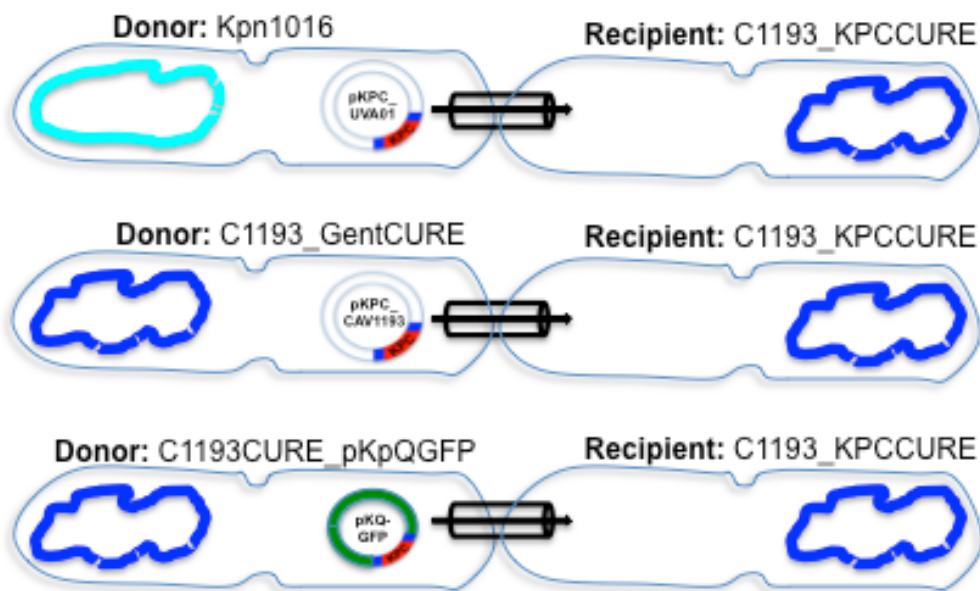

**Supplemental Figure 5.** Diagram of CAV1193 isogenic strains and Kpn1016 used in the self-transfer experiment. Kpn: *K. pneumoniae*.

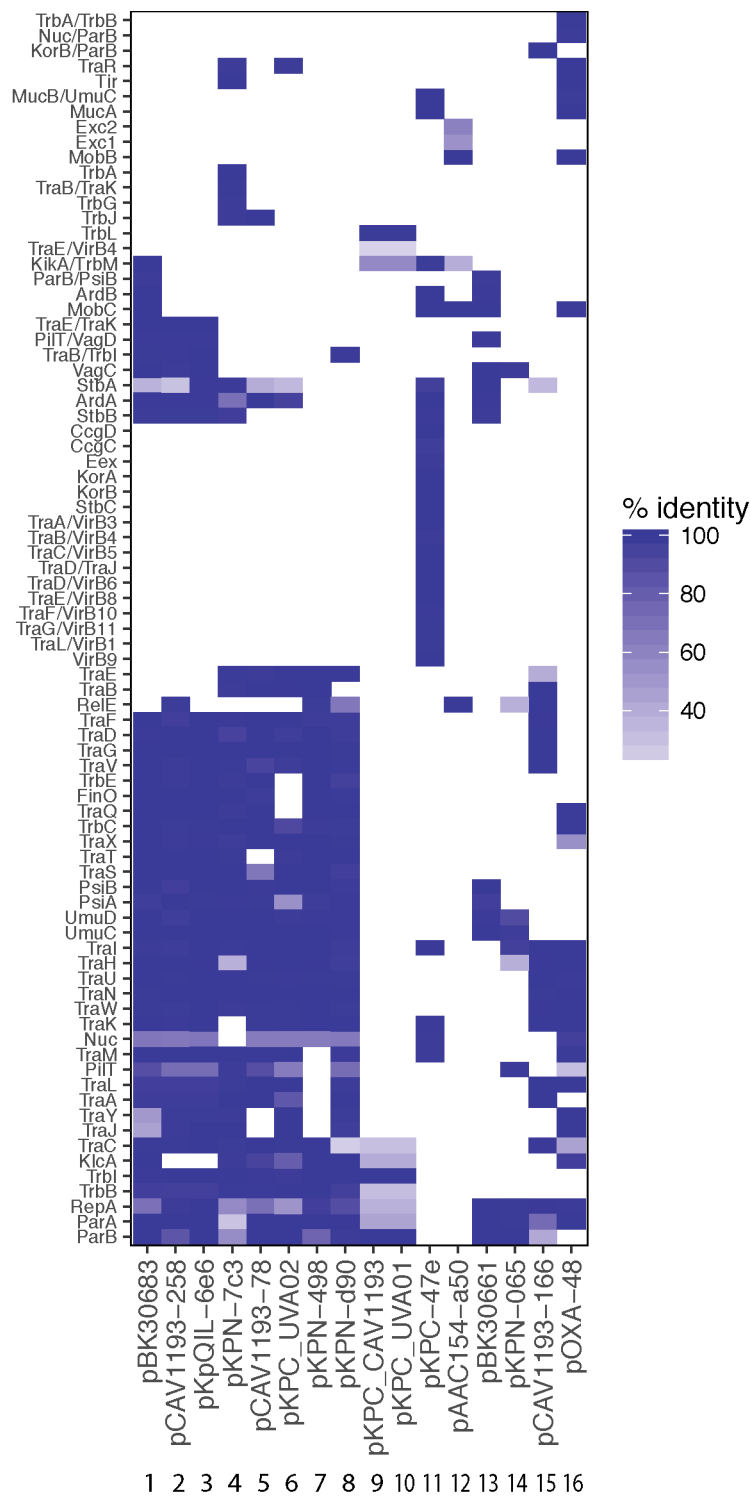

**Supplemental Figure 6.** Heat map of genes putatively associated with plasmid transfer and other plasmid-related functions. Numbers 1, 3, 6, 9-11, 13, 16: carbapenemase containing plasmids. \*denotes referenced plasmids from (1, 2, 6). Number 14: plasmid of Kpn223, a strain used as a conjugation recipient that efficiently accepted pKpQ-GFP. Number 4, 8: plasmids of Kpn555, a strain greatly attenuated as a recipient for pKpQ-GFP via conjugation. Numbers 2, 5, 7, 12, 15: additional plasmids identified in conjugation donors. Note: CAV1193-3741 is a small 3.7 kb plasmid and is not predicted to contain any proteins from our list. Plasmid-Strain associations are listed in Table 1. Kpn: *K. pneumoniae*. Plasmid sequences are arranged on the x-axis labeled by plasmid name. Genes are arranged on the y-axis. For every gene that was found on the plasmid (>50% coverage and E-value < 1e-5), we plotted the identity level for the best alignment between plasmid-encoded gene and database representative. Before plotting, genes and plasmids were clustered using hierarchical clustering in R (hclust) using Ward's method. Transposon insertion in pKPC\_CAV1193 in the TrbI gene compared to pKPC\_UVA01 is not seen as a disrupted protein in this heatmap, as the criteria for protein match were still met despite the disruption of the sequence (7).

## References:

1. **Chen L, Chavda KD, Melano RG, Hong T, Rojzman AD, Jacobs MR, Bonomo RA, Kreiswirth BN.** 2014. Molecular survey of the dissemination of two *bla*KPC-harboring IncFIA plasmids in New Jersey and New York hospitals. *Antimicrobial agents and chemotherapy* **58**:2289-2294.
2. **Dortet L, Oueslati S, Jeannot K, Tande D, Naas T, Nordmann P.** 2015. Genetic and biochemical characterization of OXA-405, an OXA-48-type extended-spectrum beta-lactamase without significant carbapenemase activity. *Antimicrobial agents and chemotherapy* **59**:3823-3828.
3. **Seemann T.** 2014. Prokka: rapid prokaryotic genome annotation. *Bioinformatics* **30**:2068-2069.
4. **Karunakaran R, Mauchline TH, Hosie AH, Poole PS.** 2005. A family of promoter probe vectors incorporating autofluorescent and chromogenic reporter proteins for studying gene expression in Gram-negative bacteria. *Microbiology* **151**:3249-3256.

5. **Mathers AJ, Stoesser N, Sheppard AE, Pankhurst L, Giess A, Yeh AJ, Didelot X, Turner SD, Sebra R, Kasarskis A, Peto T, Crook D, Sifri CD.** 2015. Klebsiella pneumoniae Carbapenemase (KPC)-Producing *K. pneumoniae* at a Single Institution: Insights into Endemicity from Whole-Genome Sequencing. *Antimicrobial agents and chemotherapy* **59**:1656-1663.
6. **Adler A, Khabra E, Paikin S, Carmeli Y.** 2016. Dissemination of the *blaKPC* gene by clonal spread and horizontal gene transfer: comparative study of incidence and molecular mechanisms. *The Journal of antimicrobial chemotherapy*.
7. **Sheppard AE, Stoesser N, Sebra R, Kasarskis A, Deikus G, Anson L, Walker AS, Peto TE, Crook DW, Mathers AJ.** 2016. Complete Genome Sequence of KPC-Producing *Klebsiella pneumoniae* Strain CAV1193. *Genome announcements* **4**.
